# Supplementary material for: Silicon-nanowire based attachment of silicon chips for mouse embryo labelling
Source: Royal Society of Chemistry journal article supplement (doi:10.1039/c4lc01299b), 2015-01-01
Supplement: c4lc01299b3.pdf [file c4lc01299b3.pdf]

## **Silicon-nanowire based attachment of silicon chips for mouse embryo labelling**

Sara Durán<sup>a</sup>, Sergi Novo<sup>b</sup>, Marta Duch<sup>a</sup>, Rodrigo Gómez-Martínez<sup>a</sup>, Marta Fernández-Regúlez<sup>a</sup>,  
Álvaro San Paulo<sup>a</sup>, Carme Nogués<sup>b</sup>, Jaume Esteve<sup>a</sup>, Elena Ibañez<sup>b</sup>, José Antonio Plaza<sup>a</sup>

<sup>a</sup> Instituto de Microelectrónica de Barcelona, IMB-CNM (CSIC), Campus UAB, 08193, Cerdanyola, Barcelona, Spain.

<sup>b</sup> Department of Cellular Biology, Physiology and Immunology, Universitat Autònoma de Barcelona, 08193, Bellaterra, Spain

**Electronic Supplementary Information**

### **Supplementary methods**

M1. Nanowire growth method assisted by catalyst gold deposition.

M2. Mouse embryo collection.

M3. Embryo sample processing.

### **Supplementary figures**

S1. The design of the barcodes.

S2. The calculated applied force between the embryo and the barcodes during the Rolling method.

S3. The calculated applied force between the embryo and the barcodes during the Pushpin method.

S4. Analyzed wires during the studies of strength and radius of curvature reached by silicon nanowires.

### **Supplementary videos**

V1. Rolling method.

V2. Pushpin method.

## **Supplementary methods**

### **M1. Nanowire growth method assisted by catalyst gold deposition**

For galvanic displacement deposition of the gold catalyst nanoparticles, the devices were immersed in a microemulsion formed by an aqueous solution which contains potassium gold (III) chloride (KAuCl<sub>4</sub>) and a low concentration of hydrofluoric acid (HF) and an organic solution made of n-heptane and a surfactant, dioctyl sodium sulfosuccinate (AOT). The mixture of this two solutions results in a microemulsion of inverse micelles. The diameter of the resulting gold nanoparticles is directly proportional to the diameter of the micelles which is proportional to the ratio between water and surfactant molecules, providing a way of controlling the diameter of the nanowires. The silicon nanowires were grown in a chemical vapor deposition tube furnace at 750 - 850°C by a mixture of SiCl<sub>4</sub> precursor gas (30 sccm - 60 sccm), BBr<sub>3</sub> dopant gas (0 sccm - 1 sccm) and Ar - 10% H<sub>2</sub> carrier gas (250 sccm - 300 sccm) for 60 - 90 seconds.

### ***M2. Mouse embryo collection***

Animal care and procedures required in this study were carried out according to the protocols approved by the Ethics Committee on Animal and Human Research of the Universitat Autònoma de Barcelona and by the Departament d'Agricultura, Ramaderia i Pesca of the Generalitat de Catalunya. Pronuclear embryos were obtained from superovulated hybrid B6CBAF1 (C57BL/6JxCBA/J) female mice (age, 8-12 weeks) injected with 5 IU of pregnant mare serum gonadotropin (Intervet, Spain) followed, 48 h later, by 5 IU of human chorionic gonadotropin (Farma-Lepori, Spain) and mated with males of the same strain. Embryos were collected from the oviducts 25 h after human chorionic gonadotropin administration, and incubated during 5-10 min at 37°C in HEPES-buffered potassium simplex optimized medium (H-KSOM),<sup>1</sup> 150 U/ml of

hyaluronidase (Sigma, Spain) for the dispersion of cumulus cells. After denudation, embryos were washed twice in fresh H-KSOM.

### **M3. Embryo sample processing for FESEM**

Embryos with barcodes attached to their ZP were washed three times in 0.1 M cacodylate buffer and fixed with 2.5% glutaraldehyde in 0.1 M cacodylate buffer (pH 7.2) for at least 2 h at room temperature (RT). Next, fixed embryos were washed three times for 5 minutes in 0.1 M cacodylate buffer and post-fixed during 2 h at RT by osmification using 1% osmium tetroxide in 0.1 M cacodylate buffer. After two rinses for 10 min in distilled water, embryos were dehydrated in a series of increasing ethanol concentrations until 100%. Finally, they were critical point-dried using CO<sub>2</sub> (CPD 030 critical point dryer Bal-Tec) and mounted onto aluminum stubs. The samples were observed under a field emission scanning electron microscope (FSEM; Merlin Zeiss, Germany).

## Supplementary figures

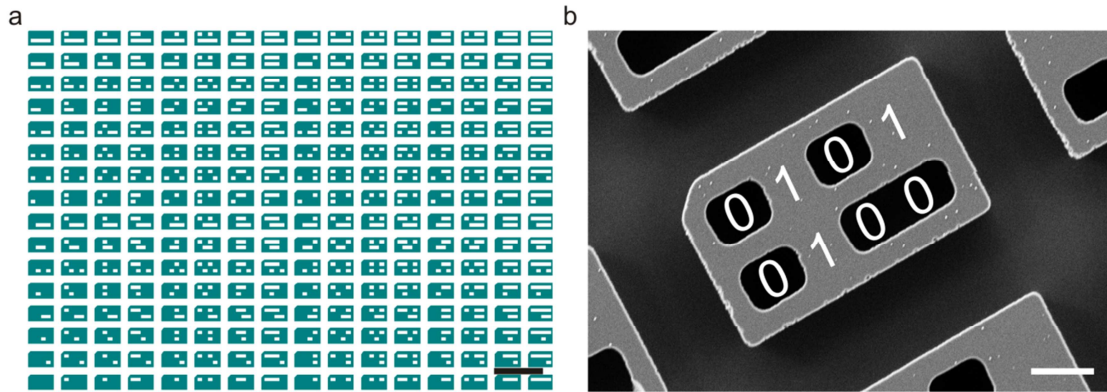

**Figure S1. The design of the barcodes.** a) Schematic view of the 256 different barcodes and b) a SEM image showing a fabricated polysilicon barcode at wafer level. They represent data by rectangular bits (full rectangle bit = 1, empty rectangle bit = 0). Black scale bar = 20  $\mu\text{m}$ , White scale bar = 2  $\mu\text{m}$ .

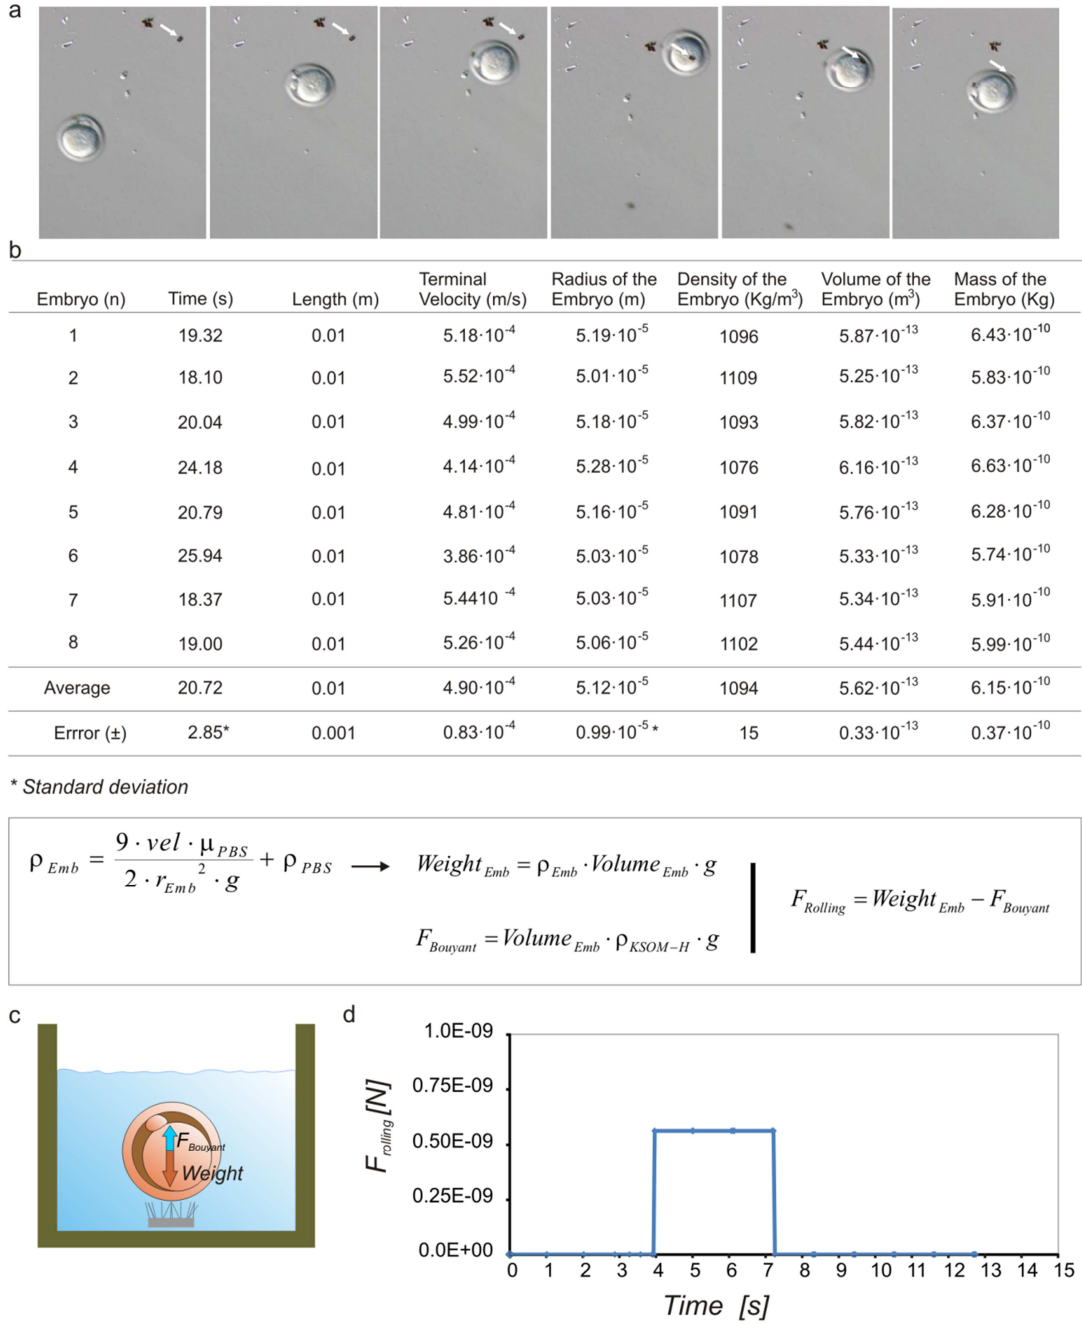

**Figure S2. The calculated assumed force between the embryo and the barcodes during the Rolling method.** a) Extracted frames from the supporting Video1 taken with an inverted optical microscope showing an embryo overpassing a barcode (white arrows) with the nanowires facing upwards. b) The weight of the embryos were calculated by determining their dimensions on an optical microscope (Volume =  $4/3 \cdot \pi \cdot r_{Emb}^3$ , where  $r_{Emb}$  is the radius of the embryo) and calculating

their average density,  $\rho_{Emb}$ . The  $\rho_{Emb}$  of the mouse embryo was calculated by using a method equivalent to the falling sphere viscometers. Eight embryos (spherical particles) were placed individually in PBS medium and allowed to descend through the liquid until they reached terminal velocity,  $vel$ . The terminal velocity was calculated by the time they took to descend 10 mm. The average density of the embryos,  $\rho_{Emb}$ , was given by the Stoke's law, where  $\mu_{PBS}$  was the viscosity of the PBS (0.001002 Kg/m·s);  $\rho_{PBS}$  was the density of the PBS (1007.7571 Kg/m<sup>3</sup>); and g was the gravitational acceleration. During the Rolling test the embryos were immersed in KSOM-H medium, with an experimentally determined density of  $992 \pm 14 \text{ kg/m}^3$ , which exerted an upward force, buoyant force. The force between the embryos and the barcodes was calculated by subtracting the buoyancy force, from the weight of the embryo. c) Two forces were applied to the embryo: its weight due to the gravity and the buoyant force. d) A step function was assumed for the applied force between the embryo and the barcode, as the force was only applied while the embryo was over the barcode.

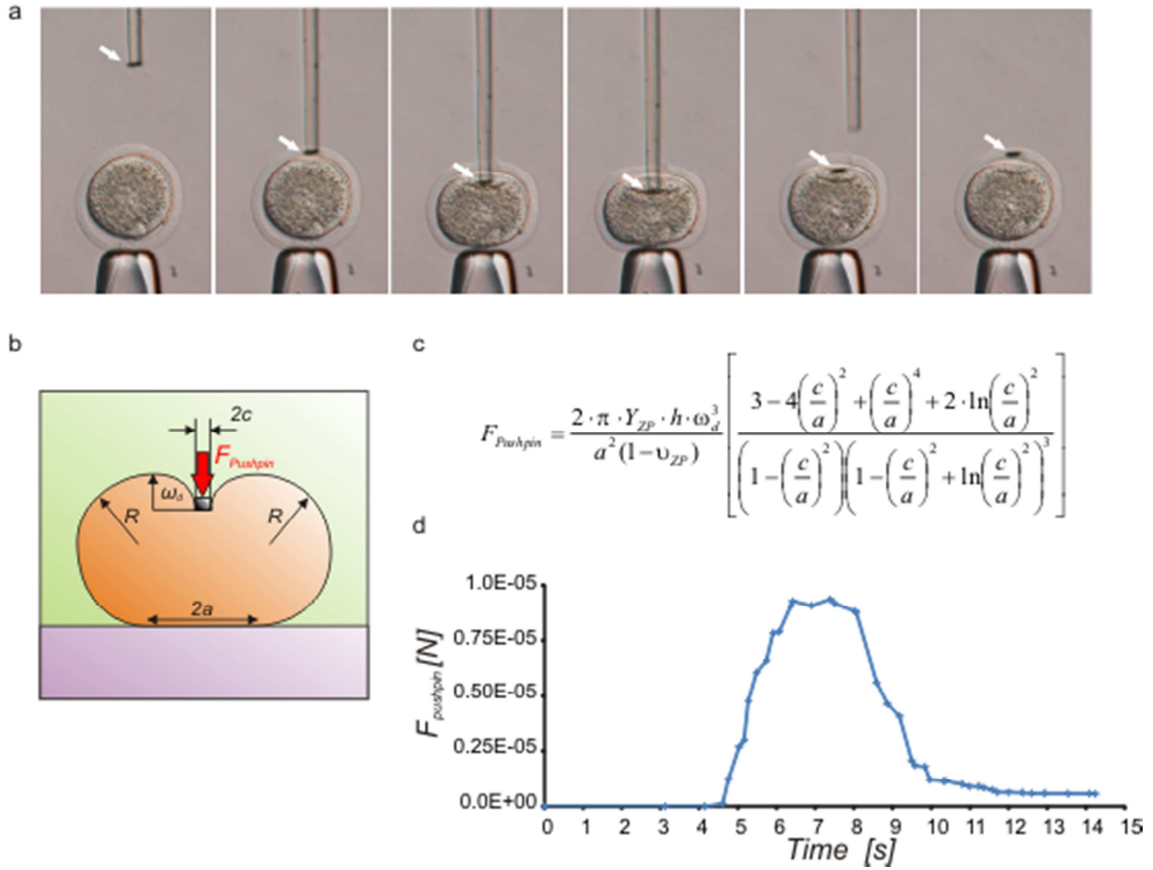

**Figure S3. The calculated applied force between the embryo and the barcodes during the Pushpin method.** a) Extracted frames from the supplementary Video 2, taken on an optical microscope, showing a barcode (white arrow) with the nanowires towards the embryo and fixed at the tip of a pipette pushing the ZP. The applied force between the barcode and the embryos was approximated by the biomechanical membrane model described by Sun et al. Elastic modulus<sup>2</sup> ( $Y_{ZP}$ ) and the Poisson ratio,<sup>3</sup> ( $\nu_{ZP}$ ) were set to 42200 Pa and 0.5, respectively. b) The geometric parameters,  $a$  and  $\omega_d$ , were measured from the images captured in the experiments (a). The constant values were  $h = 6.6 \pm 0.1 \mu\text{m}$  for the thickness of the ZP and  $c = 5.0 \pm 0.1 \mu\text{m}$  as effective indenter radius. c) Sun et al. Pushpin force formula was applied to calculate<sup>2</sup> d) the corresponding force function between the embryo and the barcode.



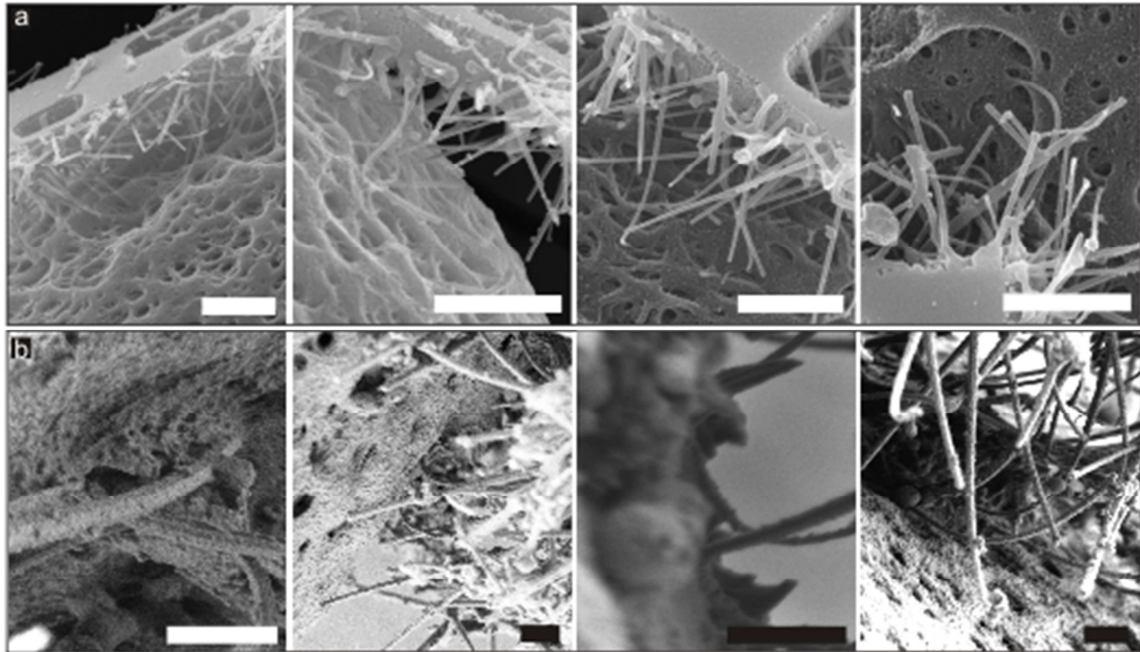

**Figure S4. Samples of silicon nanowires during the studies of strength and radius of curvature.** FESEM images of attached barcodes to the ZP showing bent nanowires. a) Scale bars = 2  $\mu\text{m}$ . b) Scale bars = 500 nm.

## REFERENCES

- (1) Biggers, J. D.; McGinnis, L. K.; Raffin, M. *Biol Reprod.* 2000, 63, 281-293.
- (2) Sun, Y.; Wan, K-T.; Roberts, K. P.; Bischof, J. C.; Nelson, B. J. *IEEE Trans. Nanobioscience* 2003, 2 (4), 279-286.
- (3) Vinckiera, A.; Semenza, G. *FEBS Letters* **1998**, 430, 12-16.
